# Supplementary material for: Integrative Deep Sequencing of the Mouse Lung Transcriptome Reveals Differential Expression of Diverse Classes of Small RNAs in Response to Respiratory Virus Infection
Source: PubMed Central journal article supplement — mBio. 2011 Nov 15;2(6):e00198-11. doi: 10.1128/mBio.00198-11 (PMC3221602; doi:10.1128/mbio.00198-11), 2011-11-15

Labels for virus infections:

- Matched mock infection
- Mutant virus: PB2 627E (Influenza), Urbani (SARS-CoV)
- Wildtype virus: VN1203 (Influenza), MA15 (SARS-CoV), PR8 (Influenza infection in MEFs)

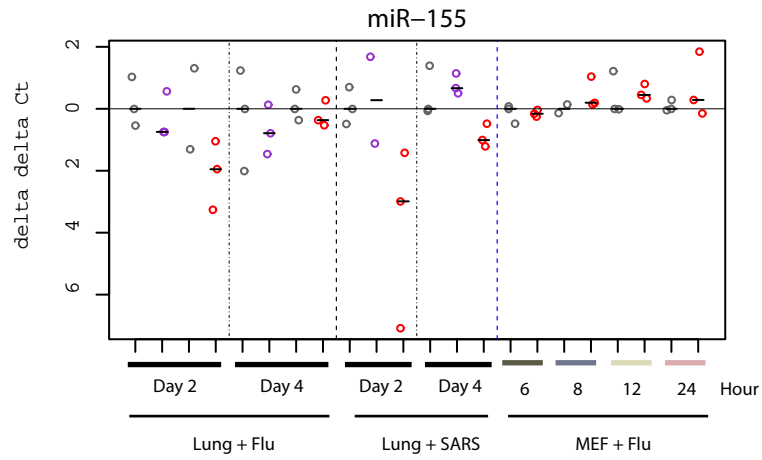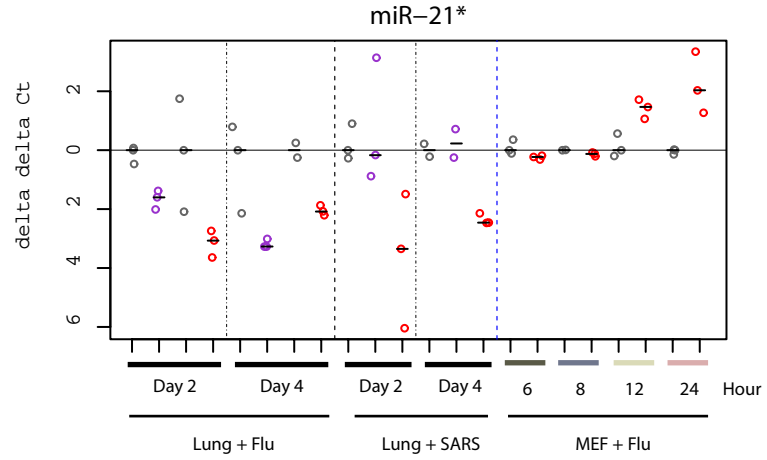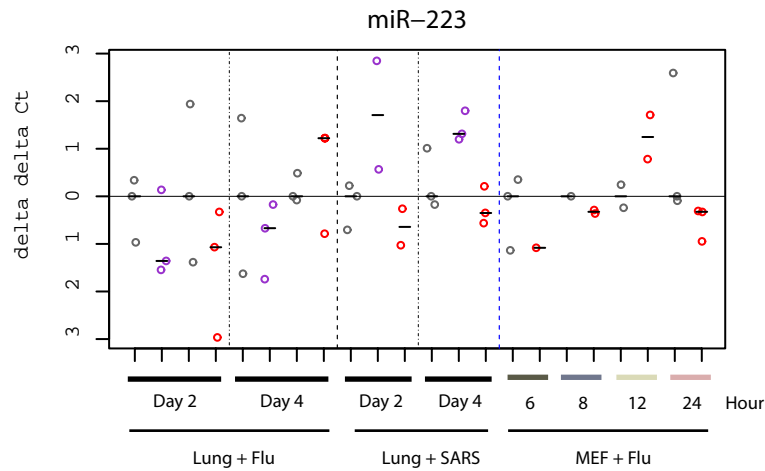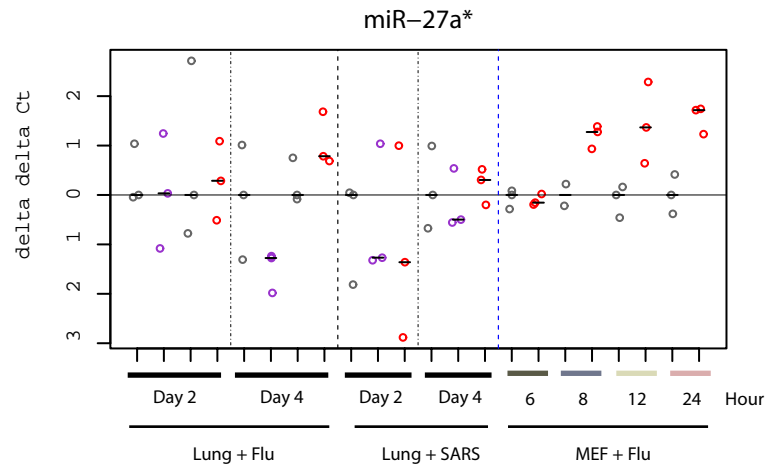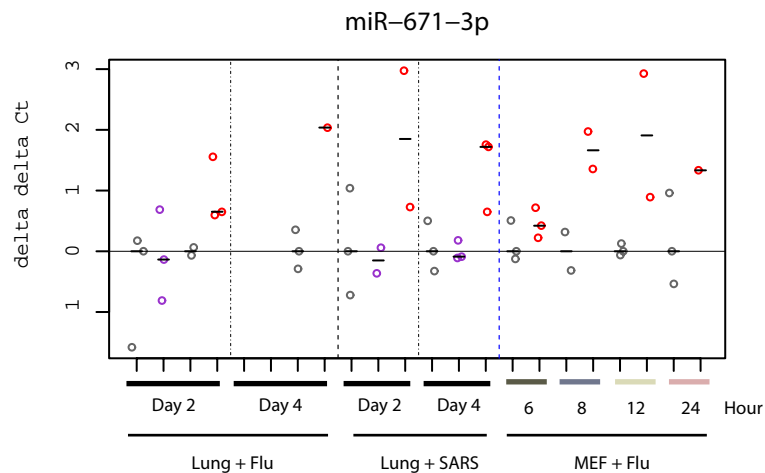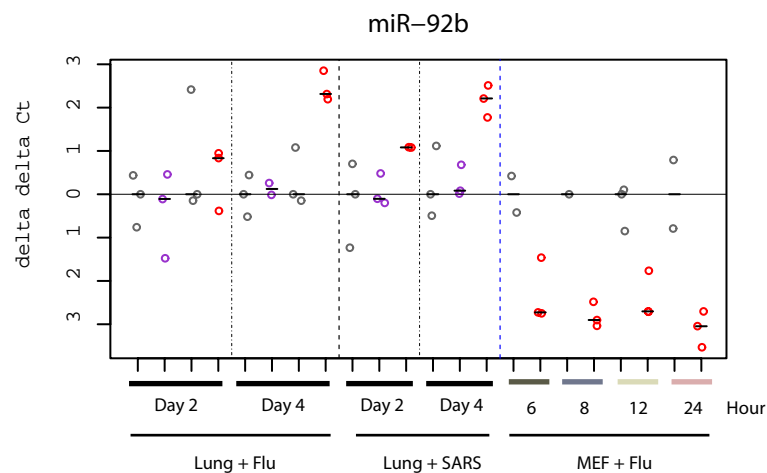

Supplement: mbo006111194sf03.pdf [file mbo006111194sf03.pdf]
