# Supplementary figures and images for: Integrative Deep Sequencing of the Mouse Lung Transcriptome Reveals Differential Expression of Diverse Classes of Small RNAs in Response to Respiratory Virus Infection
Source: PubMed Central journal article supplement — mBio. 2011 Nov 15;2(6):e00198-11. doi: 10.1128/mBio.00198-11 (PMC3221602; doi:10.1128/mbio.00198-11), 2011-11-15

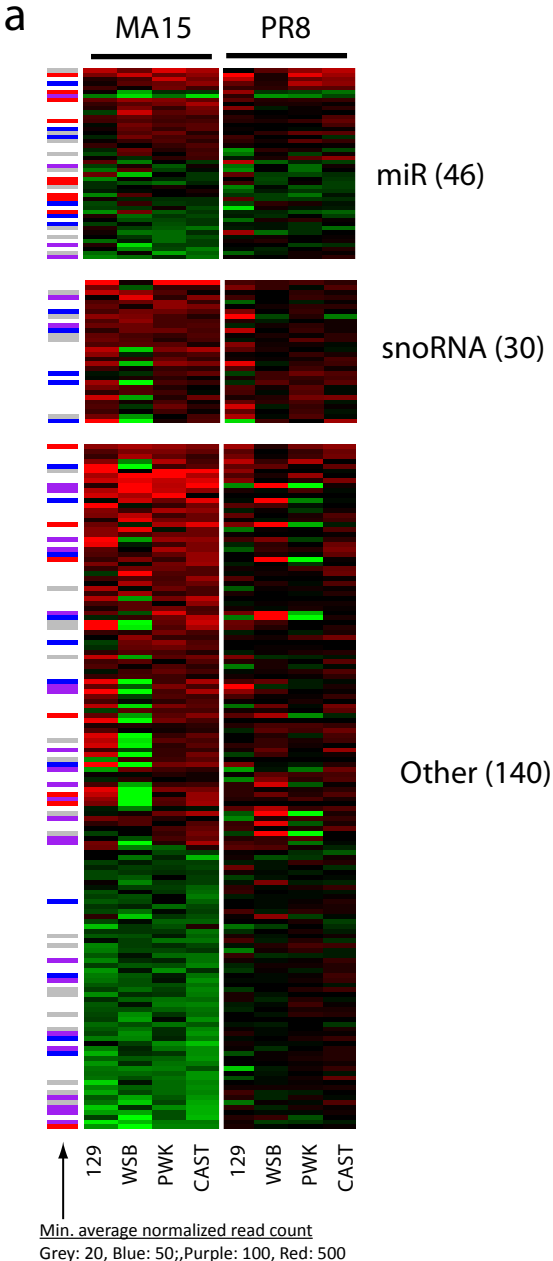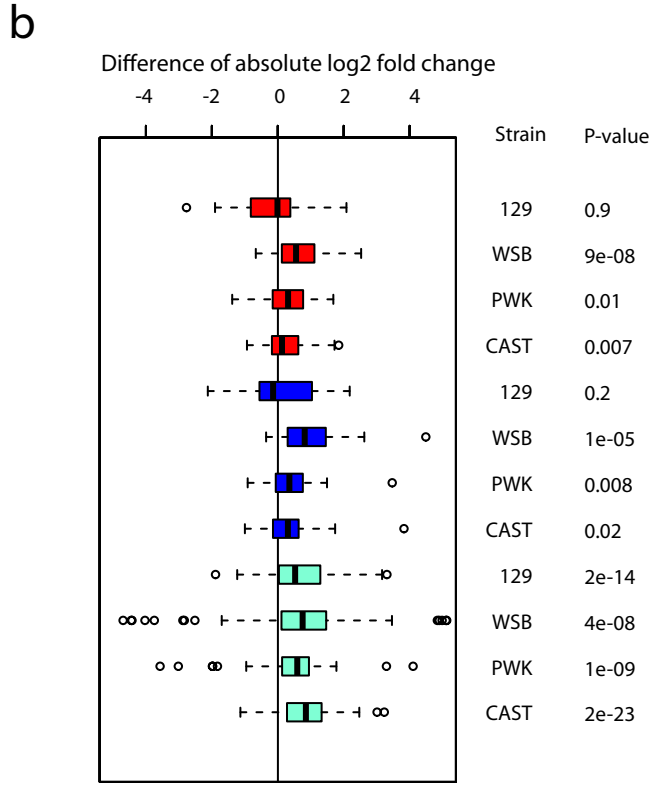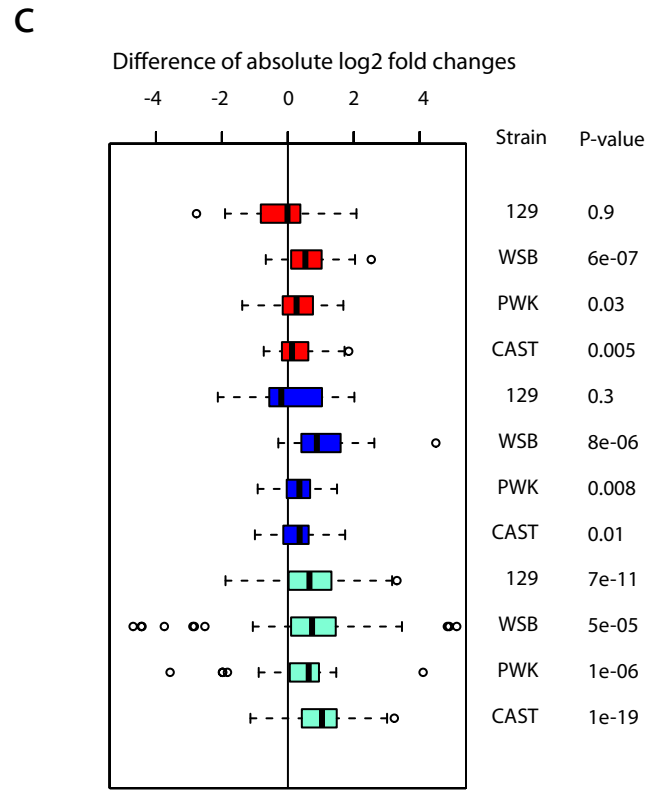

161 small RNAs with read count >0 in all 20 samples: ('miR': 41, 'snoRNA': 25, 'Other': 95)

Supplement: mbo006111194sf04.pdf [file mbo006111194sf04.pdf]

a

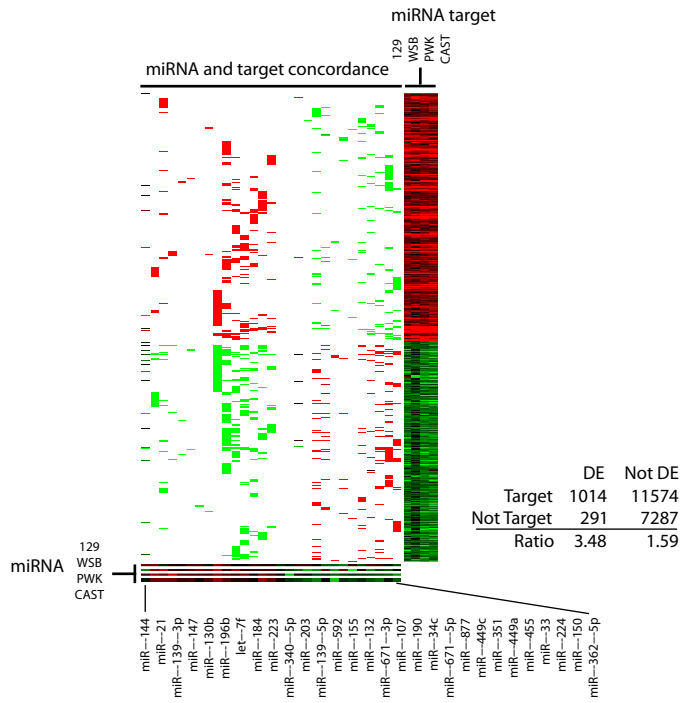

b

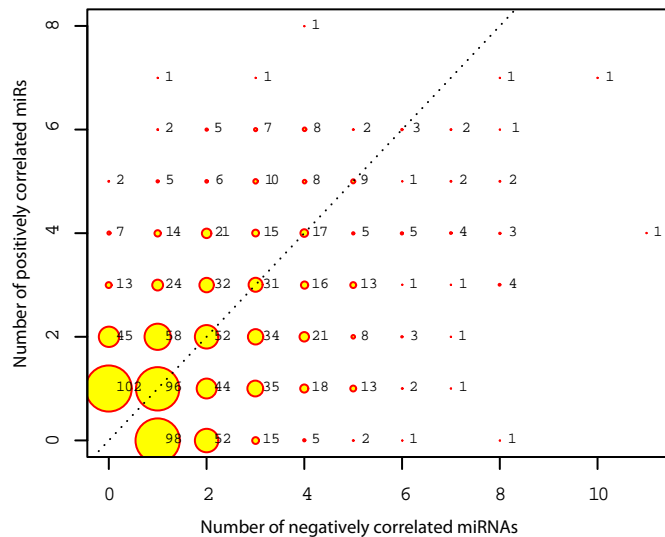

Supplement: mbo006111194sf05.pdf [file mbo006111194sf05.pdf]
